# Supplementary material for: Targeted design of synthetic enhancers for selected tissues in the Drosophila embryo
Source: PubMed Central journal article supplement (PMC10830412; doi:10.1038/s41586-023-06905-9), 2023-12-12
Supplement: 41586_2023_6905_MOESM1_ESM.pdf [file 41586_2023_6905_MOESM1_ESM.pdf]

**Supplementary information**

---

**Targeted design of synthetic enhancers for selected tissues in the *Drosophila* embryo**

---

In the format provided by the authors and unedited

## Supplementary Information Guide

### **Targeted design of synthetic enhancers for selected tissues in the *Drosophila* embryo**

Bernardo P. de Almeida<sup>1,2,†</sup>, Christoph Schaub<sup>3</sup>, Michaela Pagani<sup>1</sup>, Stefano Secchia<sup>3</sup>, Eileen E. M. Furlong<sup>3</sup>, Alexander Stark<sup>1,4\*</sup>

<sup>1</sup> Research Institute of Molecular Pathology (IMP), Vienna BioCenter (VBC), Vienna, Austria

<sup>2</sup> Vienna BioCenter PhD Program, Doctoral School of the University of Vienna and Medical University of Vienna, Vienna, Austria

<sup>3</sup> European Molecular Biology Laboratory (EMBL), Genome Biology Unit, Heidelberg, Germany

<sup>4</sup> Medical University of Vienna, Vienna BioCenter (VBC), Vienna, Austria

† Current affiliation: InstaDeep, Paris, France

\*Corresponding author. Email: [stark@starklab.org](mailto:stark@starklab.org)

## Table of Contents

|                                                                                                                      |          |
|----------------------------------------------------------------------------------------------------------------------|----------|
| <b>Supplementary Figures</b> .....                                                                                   | <b>3</b> |
| Supplementary Fig. 1. TF motifs predictive of DNA accessibility.....                                                 | 3        |
| Supplementary Fig. 2 Comparison between transfer-learning and random-initialization<br>enhancer activity models..... | 5        |
| <b>Supplementary Tables</b> .....                                                                                    | <b>7</b> |
| Table S1. TF motifs predictive of DNA accessibility. ....                                                            | 7        |
| Table S2. Results of <i>in vivo</i> validation of candidate sequences in the <i>Drosophila</i> embryo.....           | 7        |
| Table S3. Sequence splits used for 10-fold cross-validation analysis. ....                                           | 7        |

## Supplementary Figures

## Supplementary Fig. 1. TF motifs predictive of DNA accessibility.

A

TF motifs discovered by TF-Modisco

| TF motif ID                         | <i>Drosophila</i> TF | Discovered in CNS | Discovered in brain | Discovered in epidermis | Discovered in midgut    | Discovered in somatic muscle | Discovered in visceral muscle |
|-------------------------------------|----------------------|-------------------|---------------------|-------------------------|-------------------------|------------------------------|-------------------------------|
| Trf1, Trf2                          | Trf                  | yes (motif 2)     | yes (motif 1)       | yes (motif 2 & 4)       | yes (motif 2)           | yes (motif 1)                | yes (motif 2)                 |
| DRE/1, DRE/2                        | Dref, BEAF-32        | yes (motif 3)     | yes (motif 2)       | yes (motif 5)           | yes (motif 3)           | yes (motif 2)                | yes (motif 1)                 |
| Ohler1                              | ?                    | yes (motif 5)     | yes (motif 3)       | yes (motif 6)           | yes (motif 7 & 19)      | yes (motif 6)                | yes (motif 3)                 |
| CA-repeat/1, CA-repeat/2            | ?                    | yes (motif 6)     | yes (motif 6)       | yes (motif 8)           | yes (motif 6)           | yes (motif 3)                | yes (motif 5)                 |
| Ebox/CAGCTG/3 (Ohler5)              | Hsf                  | yes (motif 10)    | yes (motif 9)       | yes (motif 9)           | yes (motif 8)           | yes (motif 8)                | yes (motif 9)                 |
| Hsf/6                               | Hsf                  | yes (motif 13)    | yes (motif 17)      | yes (motif 17)          | yes (motif 16)          | yes (motif 17)               | yes (motif 16)                |
| CTCF                                | CTCF                 | yes (motif 12)    | yes (motif 14)      | yes (motif 14 & 16)     | no                      | yes (motif 14)               | no                            |
| grh/3                               | grh                  | yes (motif 14)    | yes (motif 13)      | yes (motif 11)          | yes (motif 17)          | no                           | no                            |
| Mef2/1, Mef2/2                      | Mef2                 | no                | no                  | yes (motif 11)          | yes (motif 9)           | yes (motif 4)                | yes (motif 10 & 14)           |
| Unknown6                            | ?                    | yes (motif 11)    | no                  | no                      | no                      | yes (motif 12)               | yes (motif 7)                 |
| kni/1                               | kni                  | no                | yes (motif 8)       | yes (motif 7)           | yes (motif 5)           | no                           | no                            |
| Ebox/CATGTG/twi, Ebox/CATATG/CATCTG | twi                  | no                | yes (motif 18)      | no                      | no                      | yes (motif 10)               | yes (motif 13)                |
| NHP6A/NHP                           | ?                    | no                | no                  | yes (motif 20)          | no                      | yes (motif 15)               | yes (motif 24)                |
| su(Hw)/2                            | su(Hw)               | no                | no                  | no                      | yes (motif 15)          | yes (motif 18)               | yes (motif 17)                |
| FOX/CG1152                          | fd102C               | no                | yes (motif 7)       | no                      | no                      | yes (motif 15)               | no                            |
| AGGGG                               | ttk, Kr              | yes (motif 1)     | yes (motif 4)       | no                      | no                      | no                           | no                            |
| Dip3/PAX4                           | ?                    | yes (motif 9)     | no                  | no                      | no                      | yes (motif 19)               | no                            |
| vfl (zld)                           | zld                  | no                | yes (motif 11)      | yes (motif 10)          | no                      | no                           | no                            |
| Ohler6                              | ?                    | no                | yes (motif 15)      | no                      | no                      | yes (motif 7)                | no                            |
| Unknown4                            | ?                    | no                | no                  | yes (motif 18)          | no                      | no                           | yes (motif 22)                |
| Aef1/5                              | Aef1, CG4360         | no                | no                  | yes (motif 19)          | no                      | no                           | yes (motif 15)                |
| NRF1                                | ?                    | yes (motif 7)     | no                  | no                      | no                      | no                           | no                            |
| GCCG                                | ?                    | no                | yes (motif 10)      | no                      | no                      | no                           | no                            |
| CG31782                             | CG31782              | no                | yes (motif 16)      | no                      | no                      | no                           | no                            |
| ACA/1                               | ?                    | no                | yes (motif 20)      | no                      | no                      | no                           | no                            |
| ZfCS                                | ?                    | no                | no                  | yes (motif 3)           | no                      | no                           | no                            |
| GATA/2                              | GATAd, GATAe         | no                | no                  | no                      | yes (motif 8 & 10 & 20) | no                           | no                            |
| GATA/MECOM/2                        | GATAd, GATAe         | no                | no                  | no                      | yes (motif 11)          | no                           | no                            |
| SPT3/4                              | ?                    | no                | no                  | no                      | yes (motif 4)           | no                           | no                            |
| Ohler7                              | ?                    | no                | no                  | no                      | yes (motif 12)          | no                           | no                            |
| DMRT2                               | ?                    | no                | no                  | no                      | yes (motif 13)          | no                           | no                            |
| ZNF263/2                            | ?                    | no                | no                  | no                      | yes (motif 14)          | no                           | no                            |
| SFl1                                | ?                    | no                | no                  | no                      | yes (motif 18)          | no                           | no                            |
| ci                                  | ci                   | no                | no                  | no                      | no                      | yes (motif 9)                | no                            |
| E2f/brk                             | brk                  | no                | no                  | no                      | no                      | yes (motif 11)               | no                            |
| EGR/2                               | ?                    | no                | no                  | no                      | no                      | yes (motif 20)               | no                            |
| AT-tract/4                          | ?                    | no                | no                  | no                      | no                      | yes (motif 21)               | no                            |
| Zscan4                              | ?                    | no                | no                  | no                      | no                      | yes (motif 22)               | no                            |
| FOX/2                               | bin, fd102C          | no                | no                  | no                      | no                      | no                           | yes (motif 6)                 |
| CG-tract/4                          | ?                    | no                | no                  | no                      | no                      | no                           | yes (motif 11)                |
| ETF/1                               | ?                    | no                | no                  | no                      | no                      | no                           | yes (motif 12)                |
| Y1/1                                | ?                    | no                | no                  | no                      | no                      | no                           | yes (motif 18)                |
| Mad/2                               | Mad                  | no                | no                  | no                      | no                      | no                           | yes (motif 19)                |
| CG32830/br/vvl                      | ab, br, vvl          | no                | no                  | no                      | no                      | no                           | yes (motif 20)                |
| TATA/NHP6                           | ?                    | no                | no                  | no                      | no                      | no                           | yes (motif 21)                |

B

TF expression by *in-situ* (BDGP database)

| TF motif ID                         | <i>Drosophila</i> TF | Expressed in CNS | Expressed in brain | Expressed in epidermis | Expressed in midgut | Expressed in somatic muscle | Expressed in visceral muscle |
|-------------------------------------|----------------------|------------------|--------------------|------------------------|---------------------|-----------------------------|------------------------------|
| Trf1, Trf2                          | Trf                  | yes              | yes                | yes                    | yes                 | yes                         | yes                          |
| DRE/1, DRE/2                        | Dref, BEAF-32        | yes              | yes                | yes                    | yes                 | yes                         | yes                          |
| Hsf/6                               | Hsf                  | yes              | yes                | yes                    | yes                 | yes                         | yes                          |
| CTCF                                | CTCF                 | yes              | yes                | no                     | no                  | no                          | no                           |
| grh/3                               | grh                  | no               | no                 | yes                    | no                  | no                          | no                           |
| Mef2/1, Mef2/2                      | Mef2                 | no               | no                 | no                     | no                  | yes                         | yes                          |
| kni/1                               | kni                  | no               | no                 | no                     | no                  | no                          | no                           |
| Ebox/CATGTG/twi, Ebox/CATATG/CATCTG | twi                  | no               | no                 | no                     | no                  | yes                         | yes                          |
|                                     | su(Hw)               | yes              | yes                | yes                    | yes                 | yes                         | yes                          |
|                                     | fd102C               | no               | yes                | no                     | no                  | no                          | no                           |
| AGGGG                               | ttk, Kr              | no, yes          | no, yes            | yes, yes               | yes, yes            | no                          | no                           |
| vfl (zld)                           | zld                  | yes              | yes                | yes                    | no                  | yes                         | no                           |
| Aef1/5                              | Aef1, CG4360         | yes              | yes                | yes                    | yes                 | yes                         | yes                          |
| CG31782                             | CG31782              | no               | no                 | no                     | no                  | no                          | no                           |
| GATA/2                              | GATAd, GATAe         | yes, no          | yes, no            | yes, no                | yes, yes            | yes, no                     | yes, no                      |
| GATA/MECOM/2                        | GATAd, GATAe         | yes, no          | yes, no            | yes, no                | yes, yes            | yes, no                     | yes, no                      |
| ci                                  | ci                   | no               | no                 | yes                    | no                  | no                          | no                           |
| E2f/brk                             | brk                  | no               | no                 | yes                    | yes                 | yes                         | yes                          |
| FOX/2                               | bin, fd102C          | no, no           | no, yes            | no, no                 | no, no              | no, no                      | yes, no                      |
| Mad/2                               | Mad                  | yes              | yes                | yes                    | yes                 | no                          | no                           |
| CG32830/br/vvl                      | ab, br, vvl          | no, yes, no      | no, yes, no        | yes, no, yes           | no, yes, no         | yes, no, no                 | yes, no, no                  |

C

TF expression in matched single-cell RNA-seq clusters

| TF motif ID                         | <i>Drosophila</i> TF | CNS             | brain           | epidermis       | midgut           | somatic muscle   | visceral muscle |
|-------------------------------------|----------------------|-----------------|-----------------|-----------------|------------------|------------------|-----------------|
| Trf1, Trf2                          | Trf                  | 0.46            | 0.73            | 0.5             | 0.86             | 0.73             | 0.76            |
| DRE/1, DRE/2                        | Dref, BEAF-32        | 0.03, 0.04      | 0.04, 0.06      | 0.02, 0.02      | 0.03, 0.06       | 0.07, 0.02       | 0.04, 0.03      |
| Hsf/6                               | Hsf                  | 0.16            | 0.13            | 0.11            | 0.14             | 0.13             | 0.16            |
| CTCF                                | CTCF                 | 0.01            | 0.02            | 0.01            | 0.03             | 0.02             | 0.02            |
| grh/3                               | grh                  | 0.57            | 0.59            | 1.65            | 0.43             | 0.62             | 0.71            |
| Mef2/1, Mef2/2                      | Mef2                 | 0.39            | 0.44            | 0.36            | 0.41             | 1.34             | 0.75            |
| kni/1                               | kni                  | 0.05            | 0.07            | 0.15            | 0.04             | 0.08             | 0.05            |
| Ebox/CATGTG/twi, Ebox/CATATG/CATCTG | twi                  | 0.02            | 0.01            | 0.02            | 0.01             | 0.03             | 0.03            |
| AGGGG                               | ttk, Kr              | 1.9, 0.08       | 1.04, 0.21      | 2.03, 0.06      | 1.37, 0.06       | 1.54, 0.04       | 1.4, 0.1        |
| vfl (zld)                           | zld                  | 0.56            | 0.49            | 0.43            | 0.16             | 0.4              | 0.42            |
| Aef1/5                              | Aef1, CG4360         | 0, 0.12         | 0.05, 0.09      | 0.08, 0.14      | 0.08, 0.14       | 0.05, 0.09       | 0.05, 0.12      |
| CG31782                             | CG31782              | NA              | NA              | NA              | NA               | NA               | NA              |
| GATA/2                              | GATAd, GATAe         | 0.1, 0.07       | 0.09, 0.08      | 0.05, 0.07      | 0.09, 0.47       | 0.09, 0.1        | 0.07, 0.07      |
| GATA/MECOM/2                        | GATAd, GATAe         | 0.1, 0.07       | 0.09, 0.08      | 0.05, 0.07      | 0.09, 0.47       | 0.09, 0.1        | 0.07, 0.07      |
| ci                                  | ci                   | 0.3             | 0.26            | 0.46            | 0.26             | 0.39             | 0.44            |
| E2f/brk                             | brk                  | 0.17            | 0.04            | 0.09            | 0.07             | 0.06             | 0.06            |
| FOX/2                               | bin, fd102C          | 0, NA           | 0.02, NA        | 0.01, NA        | 0, NA            | 0.04, NA         | 0.05, NA        |
| Mad/2                               | Mad                  | 0.17            | 0.21            | 0.2             | 0.22             | 0.22             | 0.19            |
| CG32830/br/vvl                      | ab, br, vvl          | 0.8, 0.06, 0.97 | 1.07, 0.64, 0.5 | 2.38, 0.1, 0.57 | 0.85, 0.13, 0.31 | 1.78, 0.15, 0.31 | 1.35, 0.3, 0.39 |

**A)** Table with motifs discovered by TF-Modisco across the different tissues. Motifs from Extended Data Fig. 2. Cells with “yes” are highlighted in color and have the respective motif ID from TF-Modisco. **B)** RNA *in situ* expression of TFs that we could assign to the identified motifs in (A) across tissues. Data from the Berkeley Drosophila Genome Project (BDGP; <https://insitu.fruitfly.org/cgi-bin/ex/insitu.pl>; see Table S1 for full annotation). Cells with “yes” are highlighted in color. **C)** TF expression values across matched single-cell RNA-seq clusters of the respective tissues. For each TF, the tissue with the highest expression is highlighted in color and bold.

## Supplementary Fig. 2 Comparison between transfer-learning and random-initialization enhancer activity models.

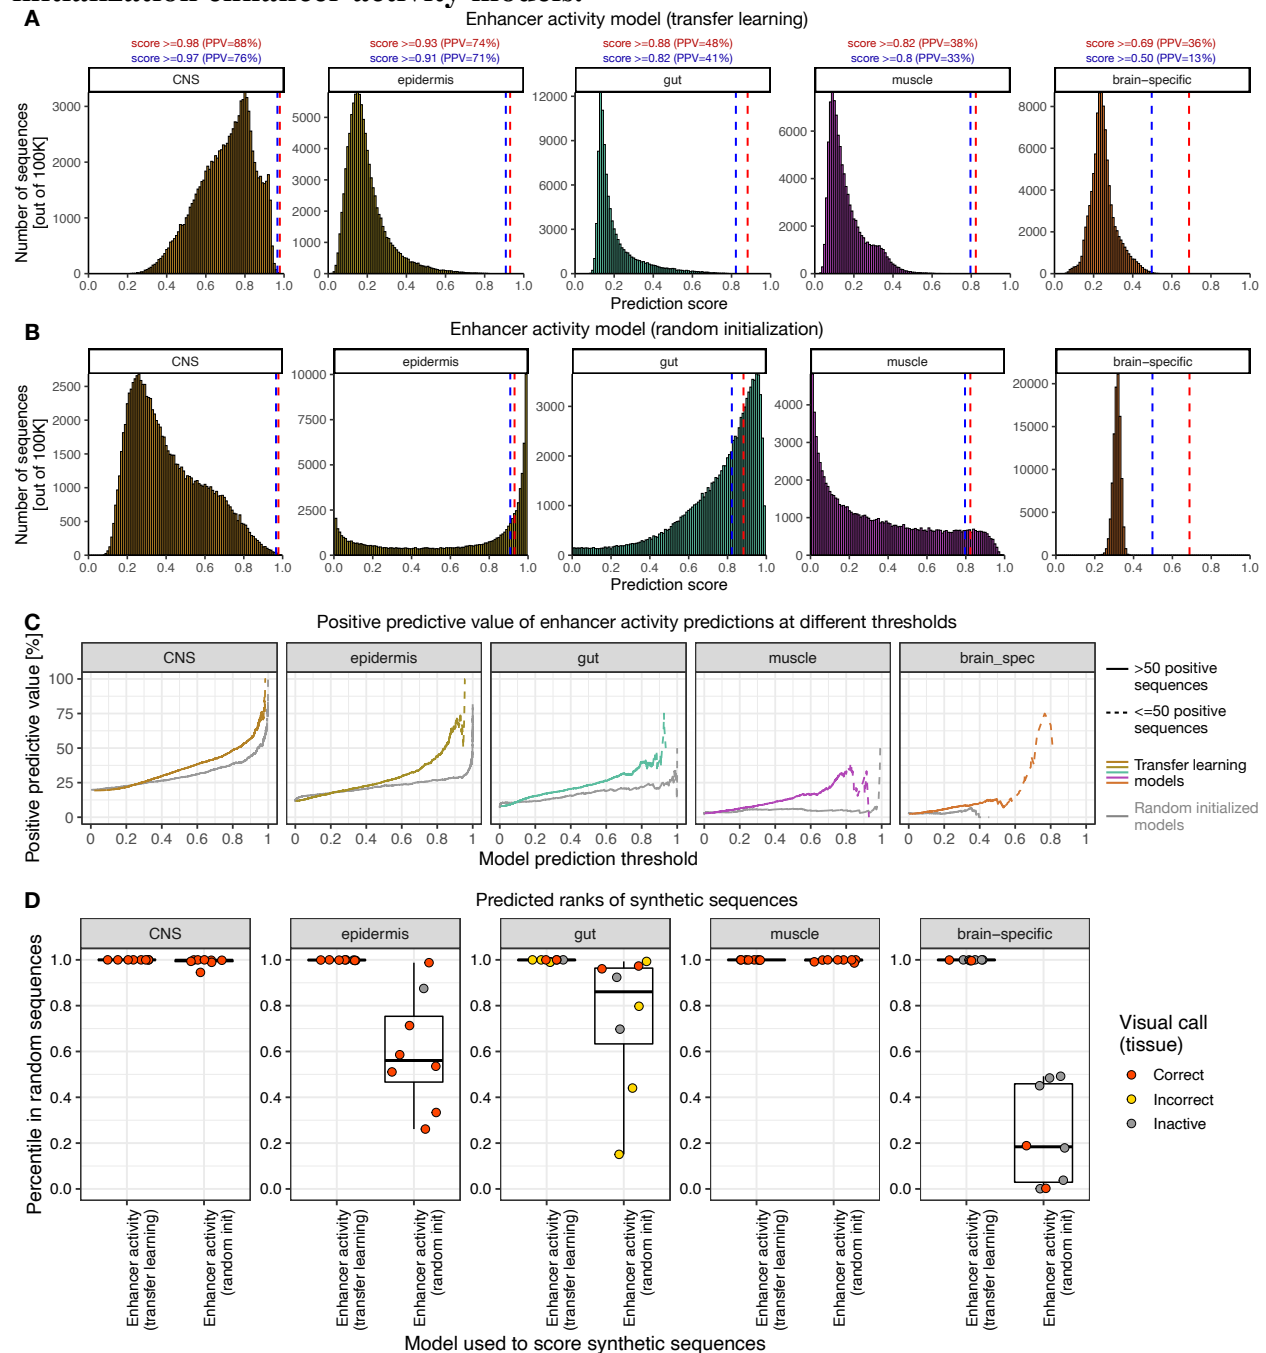

**A-B)** Histograms of prediction scores for 100,000 (100K) random sequences by the enhancer activity models with transfer learning (A) or the random initialized models (B) of each tissue. For each tissue, the Positive Predictive Value (PPV) and respective predictive score thresholds (vertical dashed lines) from Fig. 1A are shown. **C)** Positive predictive value of enhancer activity predictions at different thresholds for the models with transfer learning (colored) or models based on random initialization (grey) for each tissue. For each threshold [X-axis, 0-1], the percentage of active sequences among all positive predictions is shown [Y-axis]. Solid lines indicate percentages calculated based on more than 50 positive sequences, while dashed lines represent less confident

estimates based on smaller numbers. **D)** Percentile of the 40 synthetic candidate sequences among other 100,000 generated random sequences as scored by the tissue-specific enhancer activity models using transfer learning or using random initialization. Individual candidate sequences (dots) are colored based on their validated *in vivo* activity: correct tissue expression, incorrect tissue expression and inactive. Boxplots using the values from the 8 candidates per tissue are also shown. The boxplots mark the median, upper and lower quartiles and  $1.5\times$  interquartile range (whiskers).

## Supplementary Tables

### **Table S1. TF motifs predictive of DNA accessibility.**

Table with motifs discovered by TF-Modisco across the different tissues, including the predicted TF, and the tissues where the motif was discovered by TF-Modisco (including the motif ID). For the TFs that we could assign to the identified motifs, expression values across matched single-cell RNA-seq clusters of the respective tissues are shown. Final column contains the expression annotation of the TF at stage 13-16 from RNA *in situ* experiments from the Berkeley Drosophila Genome Project (BDGP; <https://insitu.fruitfly.org/cgi-bin/ex/insitu.pl>).

### **Table S2. Results of *in vivo* validation of candidate sequences in the *Drosophila* embryo.**

Detailed information about each candidate sequence, including the respective DNA sequence, the results of *in vivo* validation and detailed annotation of expression results, predicted scores with the enhancer activity models from the respective tissue, and their percentiles among other 100,000 randomly generated sequences.

### **Table S3. Sequence splits used for 10-fold cross-validation analysis.**
