# Supplementary material for: Targeted design of synthetic enhancers for selected tissues in the Drosophila embryo
Source: PubMed Central journal article supplement (PMC10830412; doi:10.1038/s41586-023-06905-9), 2023-12-12
Supplement: 41586_2023_6905_MOESM2_ESM.pdf [file 41586_2023_6905_MOESM2_ESM.pdf]

## Reporting Summary

Nature Portfolio wishes to improve the reproducibility of the work that we publish. This form provides structure for consistency and transparency in reporting. For further information on Nature Portfolio policies, see our [Editorial Policies](#) and the [Editorial Policy Checklist](#).

### Statistics

For all statistical analyses, confirm that the following items are present in the figure legend, table legend, main text, or Methods section.

- | n/a                                 | Confirmed                                                                                                                                                                                                                                                                                      |
|-------------------------------------|------------------------------------------------------------------------------------------------------------------------------------------------------------------------------------------------------------------------------------------------------------------------------------------------|
| <input type="checkbox"/>            | <input checked="" type="checkbox"/> The exact sample size ( $n$ ) for each experimental group/condition, given as a discrete number and unit of measurement                                                                                                                                    |
| <input type="checkbox"/>            | <input checked="" type="checkbox"/> A statement on whether measurements were taken from distinct samples or whether the same sample was measured repeatedly                                                                                                                                    |
| <input type="checkbox"/>            | <input checked="" type="checkbox"/> The statistical test(s) used AND whether they are one- or two-sided<br><i>Only common tests should be described solely by name; describe more complex techniques in the Methods section.</i>                                                               |
| <input checked="" type="checkbox"/> | <input type="checkbox"/> A description of all covariates tested                                                                                                                                                                                                                                |
| <input type="checkbox"/>            | <input checked="" type="checkbox"/> A description of any assumptions or corrections, such as tests of normality and adjustment for multiple comparisons                                                                                                                                        |
| <input type="checkbox"/>            | <input checked="" type="checkbox"/> A full description of the statistical parameters including central tendency (e.g. means) or other basic estimates (e.g. regression coefficient) AND variation (e.g. standard deviation) or associated estimates of uncertainty (e.g. confidence intervals) |
| <input type="checkbox"/>            | <input checked="" type="checkbox"/> For null hypothesis testing, the test statistic (e.g. $F$ , $t$ , $r$ ) with confidence intervals, effect sizes, degrees of freedom and $P$ value noted<br><i>Give <math>P</math> values as exact values whenever suitable.</i>                            |
| <input checked="" type="checkbox"/> | <input type="checkbox"/> For Bayesian analysis, information on the choice of priors and Markov chain Monte Carlo settings                                                                                                                                                                      |
| <input checked="" type="checkbox"/> | <input type="checkbox"/> For hierarchical and complex designs, identification of the appropriate level for tests and full reporting of outcomes                                                                                                                                                |
| <input type="checkbox"/>            | <input checked="" type="checkbox"/> Estimates of effect sizes (e.g. Cohen's $d$ , Pearson's $r$ ), indicating how they were calculated                                                                                                                                                         |

*Our web collection on [statistics for biologists](#) contains articles on many of the points above.*

### Software and code

Policy information about [availability of computer code](#)

|                 |                                                                                                                                                                                                                                                                                                                                                                                                                                                                                                                                                                                                                                                                                                                                                                                                                                                                                                                                                                                                                                                                                                                                                                                                                                                                                                                                                                     |
|-----------------|---------------------------------------------------------------------------------------------------------------------------------------------------------------------------------------------------------------------------------------------------------------------------------------------------------------------------------------------------------------------------------------------------------------------------------------------------------------------------------------------------------------------------------------------------------------------------------------------------------------------------------------------------------------------------------------------------------------------------------------------------------------------------------------------------------------------------------------------------------------------------------------------------------------------------------------------------------------------------------------------------------------------------------------------------------------------------------------------------------------------------------------------------------------------------------------------------------------------------------------------------------------------------------------------------------------------------------------------------------------------|
| Data collection | NA                                                                                                                                                                                                                                                                                                                                                                                                                                                                                                                                                                                                                                                                                                                                                                                                                                                                                                                                                                                                                                                                                                                                                                                                                                                                                                                                                                  |
| Data analysis   | <p>Code used to train the models as well as to make predictions will is available on GitHub (<a href="https://github.com/bernardo-de-almeida/DeepSTARR_embryo">https://github.com/bernardo-de-almeida/DeepSTARR_embryo</a>).</p> <p>Peak calling: MASC2<br/>Extracting DNA sequences of genomic windows across the genome: bedtools version 2.27.1.</p> <p>Deep learning models were implemented and trained in Keras (v.2.2.4) (with TensorFlow v.1.14.0) using the Adam optimizer. DeepExplainer (the DeepSHAP implementation of DeepLIFT; update from version in <a href="https://github.com/AvantiShri/shap/blob/master/shap/explainers/deep_deep_tf.py">https://github.com/AvantiShri/shap/blob/master/shap/explainers/deep_deep_tf.py</a>) was used to compute contribution scores. TF-Modisco (v.0.5.12.0) used the contribution scores to derive TF motifs.</p> <p>Sequence alignment was done using Blastn via NIH NCBI Blast <a href="https://blast.ncbi.nlm.nih.gov/Blast.cgi">https://blast.ncbi.nlm.nih.gov/Blast.cgi</a>.</p> <p>Coverage data tracks have been visualized in the UCSC Genome Browser <a href="https://genome.ucsc.edu/">https://genome.ucsc.edu/</a>.</p> <p>All statistical calculations and graphical displays have been performed in R statistical computing environment (v.3.5.1) and using the R package ggplot2 (v.3.2.1).</p> |

For manuscripts utilizing custom algorithms or software that are central to the research but not yet described in published literature, software must be made available to editors and reviewers. We strongly encourage code deposition in a community repository (e.g. GitHub). See the Nature Portfolio [guidelines for submitting code & software](#) for further information.

## Data

Policy information about [availability of data](#)

All manuscripts must include a [data availability statement](#). This statement should provide the following information, where applicable:

- Accession codes, unique identifiers, or web links for publicly available datasets
- A description of any restrictions on data availability
- For clinical datasets or third party data, please ensure that the statement adheres to our [policy](#)

The Drosophila embryo scATAC-seq data used in this study is publicly available at [https://shendure-web.gs.washington.edu/content/members/DEAP\\_website/public/](https://shendure-web.gs.washington.edu/content/members/DEAP_website/public/). We retrieved sci-ATAC-seq3 mapped reads (dm6) from each of the 18 tissue pseudo-bulk (i.e. mapped reads from all cells combined) at the 10-12 hours timepoint from ref. (12) (downloaded from [https://shendure-web.gs.washington.edu/content/members/DEAP\\_website/public/](https://shendure-web.gs.washington.edu/content/members/DEAP_website/public/) on Feb. 1st 2022, BAM files available upon request). The Drosophila dm6 genomic sequence was downloaded as a fasta file from <https://hgdownload.soe.ucsc.edu/goldenPath/dm6/bigZips/dm6.fa.gz>. The TF motif database is available at <https://github.com/bernardo-de-almeida/motif-clustering>. TF expression data was retrieved from BDGP (RNA in situ; <https://insitu.fruitfly.org/cgi-bin/ex/insitu.pl>) and [https://shendure-web.gs.washington.edu/content/members/DEAP\\_website/public/](https://shendure-web.gs.washington.edu/content/members/DEAP_website/public/) (single-cell RNA-seq). The enhancer activity data from the Vienna Tiles library is available at <https://enhancers.starklab.org/>, and the enhancer activity database CAD4 is available from REF PMID: 29539636 (Table S13). The final pre-trained accessibility and enhancer activity models, as well as the data used to train and evaluate the models, can be found on zenodo at <https://doi.org/10.5281/zenodo.8011697>.

## Research involving human participants, their data, or biological material

Policy information about studies with [human participants or human data](#). See also policy information about [sex, gender \(identity/presentation\), and sexual orientation](#) and [race, ethnicity and racism](#).

|                                                                    |                                                                             |
|--------------------------------------------------------------------|-----------------------------------------------------------------------------|
| Reporting on sex and gender                                        | <input type="text" value="This study did not involve human participants."/> |
| Reporting on race, ethnicity, or other socially relevant groupings | <input type="text" value="NA"/>                                             |
| Population characteristics                                         | <input type="text" value="NA"/>                                             |
| Recruitment                                                        | <input type="text" value="NA"/>                                             |
| Ethics oversight                                                   | <input type="text" value="NA"/>                                             |

Note that full information on the approval of the study protocol must also be provided in the manuscript.

## Field-specific reporting

Please select the one below that is the best fit for your research. If you are not sure, read the appropriate sections before making your selection.

- Life sciences       Behavioural & social sciences       Ecological, evolutionary & environmental sciences

For a reference copy of the document with all sections, see [nature.com/documents/nr-reporting-summary-flat.pdf](https://www.nature.com/documents/nr-reporting-summary-flat.pdf)

## Life sciences study design

All studies must disclose on these points even when the disclosure is negative.

|                 |                                                                                                                                                                                                                                                                                                                                                                                       |
|-----------------|---------------------------------------------------------------------------------------------------------------------------------------------------------------------------------------------------------------------------------------------------------------------------------------------------------------------------------------------------------------------------------------|
| Sample size     | <input type="text" value="Sample size is not relevant for the machine learning models presented in this work. For imaging of FISH-stained embryos, 200-300 of FISH stained embryos with the respective genetic background were used, of which representative images were chosen. This number of embryos is sufficient to analyze the consistency of the enhancer activity pattern."/> |
| Data exclusions | <input type="text" value="No data was excluded."/>                                                                                                                                                                                                                                                                                                                                    |
| Replication     | <input type="text" value="The deep learning models were replicated through 10-fold cross-validation to asses their performance, with similar results. For imaging of the activity of synthetic enhancers, 200-300 of FISH-stained embryos with the respective genetic background were used and the activity pattern was consistent across them."/>                                    |
| Randomization   | <input type="text" value="Not relevant because the samples were not grouped."/>                                                                                                                                                                                                                                                                                                       |
| Blinding        | <input type="text" value="Researchers were not blind to the identity of the genetic backgrounds of the embryos. For the remaining analyses, it is not relevant because the samples were not grouped."/>                                                                                                                                                                               |

## Reporting for specific materials, systems and methods

We require information from authors about some types of materials, experimental systems and methods used in many studies. Here, indicate whether each material, system or method listed is relevant to your study. If you are not sure if a list item applies to your research, read the appropriate section before selecting a response.

## Materials & experimental systems

- | n/a                                 | Included in the study                                           |
|-------------------------------------|-----------------------------------------------------------------|
| <input type="checkbox"/>            | <input checked="" type="checkbox"/> Antibodies                  |
| <input checked="" type="checkbox"/> | <input type="checkbox"/> Eukaryotic cell lines                  |
| <input checked="" type="checkbox"/> | <input type="checkbox"/> Palaeontology and archaeology          |
| <input type="checkbox"/>            | <input checked="" type="checkbox"/> Animals and other organisms |
| <input checked="" type="checkbox"/> | <input type="checkbox"/> Clinical data                          |
| <input checked="" type="checkbox"/> | <input type="checkbox"/> Dual use research of concern           |
| <input checked="" type="checkbox"/> | <input type="checkbox"/> Plants                                 |

## Methods

- | n/a                                 | Included in the study                           |
|-------------------------------------|-------------------------------------------------|
| <input checked="" type="checkbox"/> | <input type="checkbox"/> ChIP-seq               |
| <input checked="" type="checkbox"/> | <input type="checkbox"/> Flow cytometry         |
| <input checked="" type="checkbox"/> | <input type="checkbox"/> MRI-based neuroimaging |

## Antibodies

Antibodies used

Anti-Digoxigenin-Peroxidase, Roche #11633716001  
Anti-Fluorescein-Peroxidase, Roche #11426346910

Validation

Commercial antibodies validated in a previous paper (Schor et al, Current Biology 2018).

## Animals and other research organisms

Policy information about [studies involving animals](#); [ARRIVE guidelines](#) recommended for reporting animal research, and [Sex and Gender in Research](#)

Laboratory animals

Drosophila embryos from FlyC31 strains (genotype M{3xP3-RFP.attP}ZH-51C) were collected at BestGene Inc. and imaged at in embryonic stage 13-14.

Wild animals

No wild animals were used

Reporting on sex

Mixed male and female

Field-collected samples

No field-collected samples were used

Ethics oversight

No approval required

Note that full information on the approval of the study protocol must also be provided in the manuscript.
